## **Neural representations of others' traits predict social decisions**

Kenji Kobayashi<sup>1</sup>, Joseph W. Kable<sup>1</sup>, Ming Hsu<sup>2</sup>, & Adrianna C. Jenkins<sup>1</sup>

<sup>1</sup>University of Pennsylvania

<sup>2</sup>University of California, Berkeley

Address for correspondence:

Adrianna C. Jenkins    or    Kenji Kobayashi  
acjenk@upenn.edu      kenjik@sas.upenn.edu

## 1 **Abstract**

2  
3 To guide social interaction, people often rely on expectations about the traits of other  
4 people based on markers of social group membership, i.e., stereotypes. Although the  
5 influence of stereotypes on social behavior is widespread, key questions remain about  
6 how traits inferred from social group membership are instantiated in the brain and  
7 incorporated into neural computations that guide social behavior. Here, we show that  
8 the human lateral orbitofrontal cortex (OFC) represents the content of stereotypes about  
9 members of different social groups in the service of social decision-making. During fMRI  
10 scanning, participants decided how to distribute resources across themselves and  
11 members of a variety of social groups in a modified Dictator Game. Behaviorally, we  
12 replicated our recent finding that perceptions of others' traits, captured by a two-  
13 dimensional framework of stereotype content (warmth and competence), biased  
14 participants' monetary allocation choices in a context-dependent manner: recipients'  
15 warmth increased advantageous inequity aversion and their competence increased  
16 disadvantageous inequity aversion. Neurally, representational similarity analysis (RSA)  
17 revealed that perceptions of others' traits in the two-dimensional space were  
18 represented in the temporoparietal junction and superior temporal sulcus, two regions  
19 associated with mentalizing, and in the lateral OFC, known to represent latent  
20 environmental features during goal-directed outcome inference outside the social  
21 domain. Critically, only the latter predicted individual choices, suggesting that the effect  
22 of stereotypes on behavior is mediated by inference-based, domain-general decision-  
23 making processes in the OFC.

## 24 **Introduction**

25  
26 In daily human life, people frequently make decisions about how to treat other  
27 people. Whether these decisions are fleeting (e.g., “Do I hold open the door for the  
28 approaching person?”) or more consequential (“Whom should I hire?”), a hallmark of  
29 human social decision-making is flexibility: the ability to adapt our behavior to  
30 interactions with different individuals based on information about what those individuals  
31 are like. However, people’s assumptions about what others are like are not always  
32 accurate. In particular, they are known to be influenced disproportionately by cues to the  
33 person’s group membership, such as the person’s gender, age, nationality, or  
34 occupation (i.e., stereotypes)<sup>1-4</sup>, setting up the potential to perpetuate disparities in  
35 treatment across different social groups. Although an abundance of research in the  
36 behavioral sciences has examined when and how people stereotype others based on  
37 their group membership<sup>5,6</sup> and documented treatment disparities in domains ranging  
38 from medicine to healthcare<sup>7</sup>, it has been a challenge to characterize the impact of  
39 stereotypes on social decision-making processes, including the computational  
40 mechanisms that mediate the influence of stereotype information on social behavior<sup>8,9</sup>.

41 A recent advance at the intersection of psychology and behavioral economics  
42 offers a new framework to test hypotheses about how stereotypes about others’ traits  
43 are incorporated into neural computations that guide contextually-flexible social  
44 behavior. This advance builds upon the observation that stereotypes are structured  
45 along core dimensions of trait perception, such as warmth (the degree to which people  
46 have good intentions toward others) and competence (the degree to which people are

47 capable of acting on their intentions)<sup>5,6</sup>. Using a novel modeling approach, we recently  
48 characterized how trait perceptions interact with the decision context to guide people's  
49 resource allocation behavior<sup>10</sup> toward members of different social groups<sup>8</sup>. Specifically,  
50 by incorporating stereotypes about others' warmth and competence into a  
51 computational model of social valuation<sup>11,12</sup>, we found that these two dimensions of  
52 stereotype content exerted dissociable, context-dependent effects on individuals'  
53 aversion to different forms of inequity: people were averse to receiving more money  
54 than stereotypically warm others, and people were averse to receiving less money than  
55 stereotypically competent others. In turn, this approach made it possible to predict with  
56 high accuracy not only individuals' behavior toward a wide variety of social groups in a  
57 laboratory setting but also people's treatment of members of different social groups in  
58 labor and education settings<sup>8</sup>.

59 This evidence points to the possibility that assumptions about others' traits may  
60 be represented in the brain in a way that (i) corresponds to a dimensional structure of  
61 stereotype content and (ii) enables stereotypes to exert influence on the computations  
62 underlying social decisions in a context-dependent manner. To test this, we used fMRI  
63 and representational similarity analysis along with a social decision task involving  
64 members of different social groups.

65 Our hypotheses build upon our recent behavioral findings along with previous  
66 neuroimaging research into trait perception and stereotyping, on the one hand, and into  
67 value-based decision-making, on the other. First, a consistent set of brain regions  
68 including the temporoparietal junction (TPJ), superior temporal sulcus (STS), and

69 medial prefrontal cortex (MPFC) is activated when people think about the minds of  
70 others and is therefore sometimes referred to collectively as the mentalizing network<sup>13–</sup>  
71 <sup>20</sup>. Activations of the mentalizing network have been observed across a wide range of  
72 social task paradigms, including those that require inference of others' traits based on  
73 their group membership (i.e., stereotyping)<sup>21–25</sup>. However, it remains unclear whether  
74 and how these regions mediate the effect of stereotypes on social decision-making, in  
75 large part because past studies of stereotyping have primarily involved passive viewing  
76 or basic judgments about others, making empirical characterization of behavior  
77 inapplicable; have focused mostly on *how active* different brain regions are, rather than  
78 on multi-dimensional trait representations<sup>26</sup>; and have primarily involved judgments  
79 about a small number of social groups (e.g., males versus females<sup>24,27</sup>), rather than a  
80 set of targets spanning the space of trait perception<sup>28</sup>.

81         Second, value-based decision-making has long been associated with processes  
82 in a set of frontostriatal regions, including the ventral striatum, the ventromedial  
83 prefrontal cortex, and the orbitofrontal cortex (OFC)<sup>28–33</sup>. A particularly intriguing area is  
84 OFC, which is thought to guide flexible, goal-directed decisions by representing defining  
85 features of the task or environment, often not directly observable but inferred, that are  
86 critical for inferring or imagining future decision outcomes<sup>29–35</sup>. Accordingly, the OFC  
87 may play a critical role in social behavior by representing others' traits in ways that are  
88 behaviorally relevant. If so, OFC processes could plausibly serve as a route through  
89 which trait representations inform inference-based evaluation of overall decision  
90 outcomes in social contexts, including how subjectively rewarding particular monetary

91 allocations with particular recipients will be. This account has the potential to unify the  
92 seemingly independent effects observed in past studies of social decision-making,  
93 which have shown that choices in the lab and field are modulated by overt  
94 characteristics such as race<sup>36</sup>, gender<sup>37</sup>, and attractiveness<sup>38,39</sup>, by suggesting that they  
95 share a reliance on core, underlying representations of perceived trait content.

96         Here we report evidence that neural representations of perceived trait content  
97 systematically bias social decisions in a way that relies on domain-general mechanisms  
98 of value-based decision-making in OFC. To do this, we conducted an fMRI experiment  
99 in which participants made decisions about how to allocate money across themselves  
100 and individuals from a variety of different social groups. Extending our previous  
101 behavioral findings<sup>8</sup>, we find that recipients' perceived warmth increases advantageous  
102 inequity aversion and perceived competence increases disadvantageous inequity  
103 aversion. At the neural level, RSA revealed that stereotypic trait content was  
104 represented along the warmth and competence dimensions in the TPJ and STS, key  
105 regions in the mentalizing network, and in the OFC, a key region for goal-directed  
106 decision-making. Critically, we found that the representation in the OFC, but not in the  
107 other regions, predicted individual participants' contextually-sensitive monetary  
108 allocation decisions. This suggests that, while regions of the mentalizing network may  
109 be involved in inferences about others' traits, the effects of those trait perceptions on  
110 social decisions are mediated by domain-general mechanisms of inference-based, goal-  
111 directed decision-making centered in the OFC.

112

## 113 Results

### 114 Experimental paradigm

115 Participants ( $n = 32$ ) played an extended version of the Dictator game in an fMRI  
 116 experiment. The participant played the role of Dictator and, on each trial, decided how  
 117 to allocate money between themselves and a recipient. To experimentally manipulate  
 118 the participant's perception of the recipient's traits across trials, we provided one piece  
 119 of information about the recipient's social group membership (e.g., their occupation or  
 120 nationality). We selected 20 social groups to span a wide range of social perception  
 121 along the trait dimensions of warmth and competence, and ratings of their warmth and

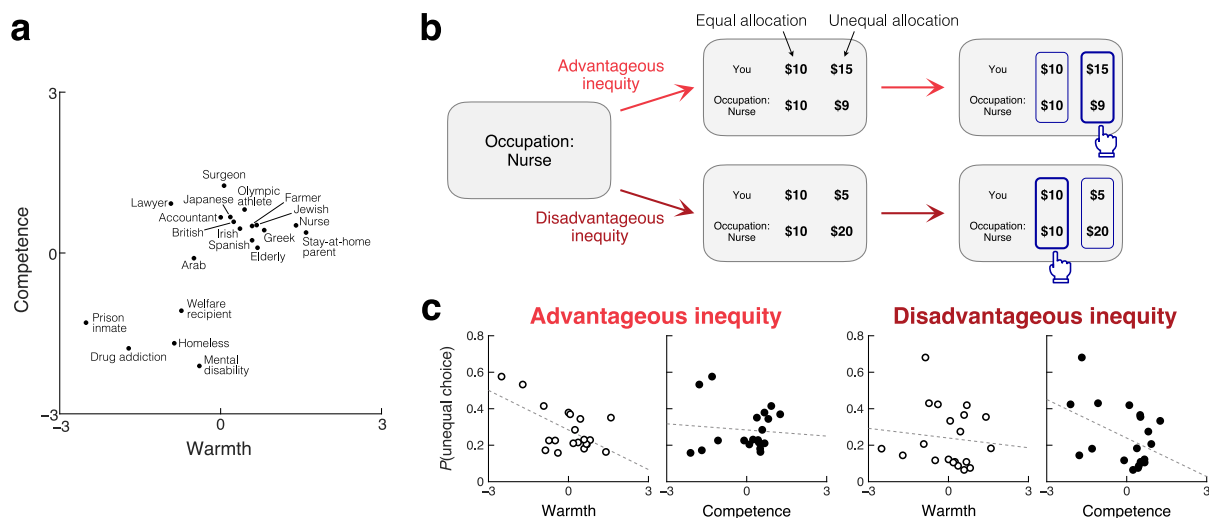

**Fig 1. Experimental paradigm and behavioral results.** **a.** Recipients in the Dictator game were identified by their social group membership. 20 social groups were chosen so that the recipient's perceived warmth and competence were variable across trials. **b.** On each trial, the recipient's social group was first presented, followed by two allocation options, one equal and one unequal. The participant was asked to make a binary choice. The unequal option allocated more money to the participant than the recipient in advantageous inequality trials (*top*) and less money in disadvantageous inequality trials (*bottom*). **c.** Participants' allocation choices were influenced by the recipient's perceived traits in a context-dependent manner. *Left:* In advantageous inequality trials, participants were less likely to choose the unequal option (and more likely to choose the equal option) when the recipient's perceived warmth was higher ( $r = -.60$ , permutation  $p = .004$ ), irrespective of their competence ( $r = -.09$ ,  $p = .331$ ). *Right:* in disadvantageous inequality trials, participants were less likely to choose the unequal option when the recipient's perceived competence was higher ( $r = -.43$ ,  $p = .040$ ), irrespective of their warmth ( $r = -.11$ ,  $p = .307$ ).

122 competence were collected in an independent, online sample (Fig. 1a)<sup>8</sup>. We also  
123 collected social perception ratings from our fMRI participants after scanning and  
124 confirmed that they were highly consistent with the independent ratings (Fig. S1),  
125 demonstrating the robustness of our social perception measures.

126 On each trial, the participant was presented with the information about the  
127 recipient (e.g., "Occupation: Nurse"; "Nationality: Japanese"), and then with two  
128 monetary allocation options, between which they were asked to choose one (Fig. 1b).  
129 We manipulated these options so that we could empirically characterize the tradeoff  
130 between decision-making motives, i.e., maximization of one's own payoff and concern  
131 for the inequity between oneself and the recipient. Specifically, in some trials, the  
132 participant chose between an equal allocation and an unequal allocation that created  
133 advantageous inequity (i.e., allocating more money to the participant than to the  
134 recipient); in other trials, the participant chose between an equal allocation and an  
135 unequal allocation that created disadvantageous inequity (i.e., allocating less money to  
136 the participant than to the recipient). This forced choice design allowed us to directly  
137 examine how participants' preferences about advantageous and disadvantageous  
138 inequity depend on the recipient, and specifically, on the recipient's perceived warmth  
139 and competence.

140

### 141 **Context-dependent effects of others' traits on social decisions**

142 Behaviorally, the recipients' perceived warmth and competence exerted diverging  
143 effects on participants' monetary allocation decisions; perceived warmth influenced



144 choices in advantageous inequity trials, while perceived competence influenced choices  
145 in disadvantageous inequity trials (Fig. 1c). In advantageous inequity trials, participants  
146 were less likely to choose the unequal allocation (and more likely to choose the equal  
147 allocation) when the recipient's perceived warmth was higher (Pearson's  $r = -.60$ ,  
148 permutation  $p = .004$ ). Their choices about advantageous inequity were not correlated  
149 with perceived competence ( $r = -.09$ ,  $p = .331$ ), and the effect of warmth was stronger  
150 than that of competence ( $p = .004$ ). Conversely, in disadvantageous inequity trials,  
151 participants were less likely to choose the unequal allocation when the recipient's  
152 perceived competence was higher ( $r = -.43$ ,  $p = .040$ ). Their choices about  
153 disadvantageous inequity were not correlated with perceived warmth ( $r = -.11$ ,  $p$   
154  $= .307$ ), and the effect of competence was stronger than that of warmth ( $p = .049$ ).  
155 Therefore, aversion to advantageous inequity increases with the recipient's warmth,  
156 whereas aversion to disadvantageous inequity increases with the recipient's  
157 competence. These behavioral results replicate our previous findings<sup>8</sup> despite  
158 substantial differences in experimental design, including the use of binary forced  
159 choices between equal and unequal allocations (rather than continuous allocations) in  
160 the current study.

161

## 162 **Neural representations of others' traits**

163 Our behavioral findings show that perceptions of other people's traits, guided by  
164 information about social groups and organized along distinct dimensions of warmth and  
165 competence, exert strong and dissociable effects on social decision-making processes

166 as captured by our extended Dictator game. Accordingly, we next looked for neural  
167 representations of these perceived traits. To elucidate the representation of perceived  
168 traits and not payoff structures or decision processes, we focused on BOLD signals  
169 during the portion of each trial when the participant was presented with the recipient's  
170 group membership, prior to the presentation of the allocation options (Fig. 1a). We  
171 looked for brain regions where two recipients that are similar to each other in perceived  
172 traits (e.g., an Accountant and a Japanese person, who are both perceived to have high  
173 competence and moderate warmth) evoke similar response patterns, and two recipient  
174 that are dissimilar in perceived traits (e.g., an Accountant and a Prison inmate) evoke  
175 dissimilar response patterns (representational similarity analysis; RSA<sup>40</sup>). We adopted a  
176 whole-brain searchlight approach that looked for brain regions where the  
177 representational dissimilarity matrix (RDM) of the local response patterns in a spherical  
178 searchlight was correlated with RDM of the perceived trait, defined by pairwise  
179 Euclidean distance in the two-dimensional space of warmth and competence (Fig. 2a).  
180 To construct the neural RDM, we quantified dissimilarity in response patterns using  
181 cross-validated Mahalanobis distance, which is a metric of the extent to which response  
182 patterns evoked by different recipients are consistently distinguishable across scanning  
183 runs<sup>41</sup>.

184 Our RSA revealed that recipients' perceived warmth and competence are  
185 represented in left lateral orbitofrontal cortex (OFC), which has long been associated  
186 with inference-based, goal-directed decision-making (threshold-free cluster  
187 enhancement [TFCE], whole-brain family-wise error [FWE] corrected  $p < .05$ ). In

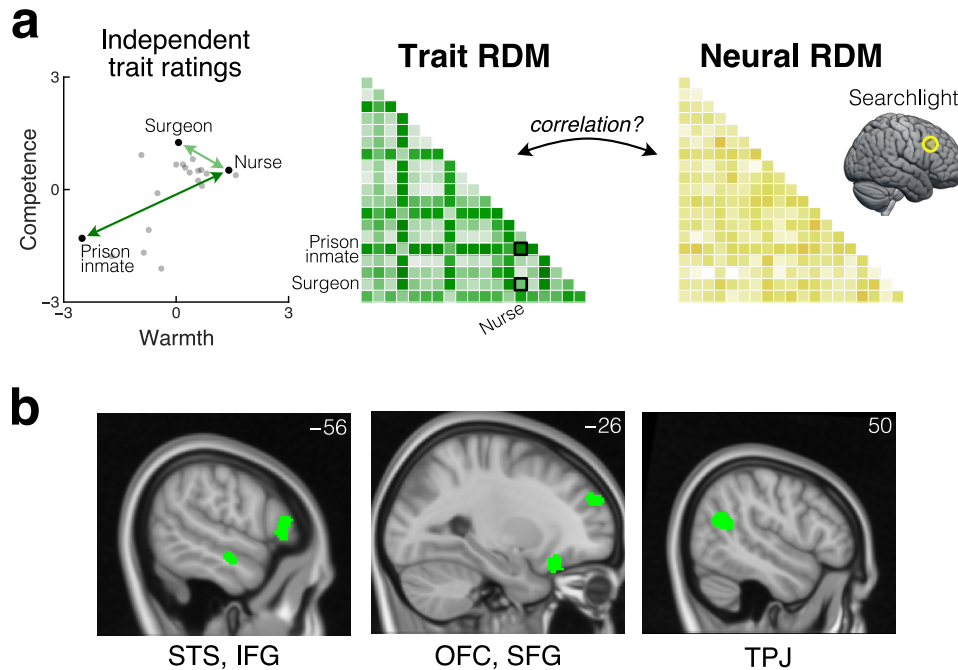

**Fig 2. Neural representations of others' traits.** **a.** Whole-brain searchlight RSA looked for neural representations of the recipient's perceived traits. The trait RDM was defined based on pairwise Euclidean distance in the two-dimensional space of warmth and competence. The neural RDM was computed for each searchlight based on pairwise cross-validated Mahalanobis distance between voxel-wise responses. **b.** Trait representation was found in left STS, left IFG, left OFG, left SFG, right TPJ, and right PMC (not shown) (whole-brain FWE-corrected TFCE  $p < .05$ ).

188 addition to the OFC, perceived traits are also represented in several other regions,  
189 including those associated with mentalizing, such as the right temporoparietal junction  
190 (TPJ), left superior temporal sulcus (STS), left inferior frontal gyrus, left superior frontal  
191 gyrus, and right premotor cortex (Fig. 2b).

192

### 193 **Linking neural trait representations to choice behavior**

194 Next, we investigated to what extent trait representations in these regions  
195 contributed to participants' subsequent monetary allocation decisions (Fig. 3a). We  
196 reasoned that, if representations in any of the trait-representing regions (Fig. 2b)  
197 contribute to decision-making, then individual variations in local neural responses in

198 such a region should predict individual variation in allocation choices. More specifically,  
199 if two recipients evoke similar response patterns in a particular region of a particular  
200 participant's brain, and representations in that region contribute to decision-making in  
201 this context, then the participant should have treated those two recipients similarly.  
202 Likewise, recipients that evoke dissimilar response patterns in a given participant should  
203 have been treated dissimilarly by that participant. To test for such a relationship  
204 between neural responses and individual choices, we ran another RSA that examined  
205 the relationship between neural RDMs (on response patterns during the epoch of  
206 recipient identity presentation, as in the previous RSA) in each of the trait regions (Fig.

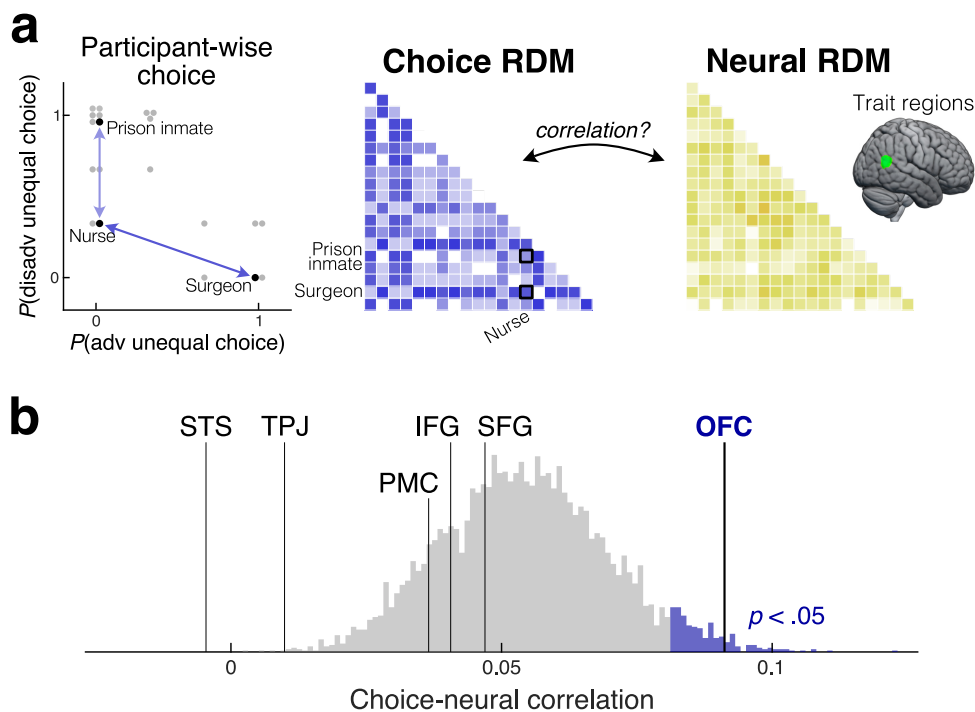

**Fig 3. Correlation between neural representations of traits and individual choices. a.**

Relationship between individual-level allocation choices and response patterns in the regions that represent others' traits (identified in Fig. 2b) was evaluated in the second RSA. The choice RDM was constructed for each participant based on pairwise Euclidean distance in the two-dimensional space of choice frequency in advantageous and disadvantageous inequity trials. Its relationship with the neural RDM in each trait region was measured by Z-transformed Spearman correlation. Shown is the data from one exemplar participant. b. The neural RDM in the OFC ( $p = .011$ ), but not in any other region ( $p > .50$ ), was significantly correlated with the individual-level choice RDM. Histogram: permutation-based FWE-corrected null hypothesis distribution.

207 2b) and choice RDMs at the individual subject level (Fig. 3a). We visualized each  
208 participant's choice frequency against each recipient (i.e., how often they chose the  
209 unequal allocation over the equal allocation) as a two-dimensional space, with choices  
210 in advantageous inequity trials on one axis and choices in disadvantageous inequity on  
211 the other axis. Pairwise Euclidean distance in this choice space was used to construct  
212 the individual choice RDM. To test the correlation between individual choice RDMs and  
213 neural RDMs above and beyond the population-level effects of warmth and  
214 competence, we obtained an FWE-corrected null-hypothesis distribution via permutation  
215 (randomly pairing choice and neural RDMs from different participants).

216 This analysis revealed that only responses in the lateral OFC predicted individual  
217 allocation choices above chance (FWE corrected across the ROIs,  $p = .011$ ; Fig. 3b).  
218 No other region exhibited a significant relationship with choices ( $p > .50$ ). This suggests  
219 that the representation of the recipient's traits in the lateral OFC contributes to the  
220 allocation decisions. Importantly, while our behavioral analysis revealed that the trait  
221 dimension (warmth or competence) that drives choices is *dependent on the decision*  
222 *context* (advantageous or disadvantageous inequity), responses in the lateral OFC were  
223 characterized by the two-dimensional spaces of traits (warmth and competence) and  
224 choices (advantageous and disadvantageous inequity), even before the participant was  
225 informed of the specific decision context. Taken together, these results suggest that the  
226 OFC plays a critical role in incorporating the perception of others' traits into social  
227 decision-making in a highly flexible, goal-directed, context-dependent manner.

228

## 229 **Discussion**

230 Adaptive social decision-making relies on information about others' traits and  
231 mental states. However, we often need to interact with people with whom we have very  
232 little experience. In such cases, people sometimes rely on inferences derived from  
233 societally shared stereotypes based on cues to others' social group membership<sup>1-6,8</sup>.  
234 Here, we identified a neural route through which stereotype content influences social  
235 decision-making. Using an extended Dictator game paradigm in which participants  
236 allocated monetary resources between themselves and various recipients identified by  
237 information about their social group membership, we first showed that people  
238 spontaneously treat others differently depending on their perceived traits in a context-  
239 dependent manner; advantageous inequity aversion increased with the recipient's  
240 warmth, while disadvantageous inequity aversion increased with their competence.  
241 Using fMRI and RSA, we further showed that the recipients' traits were represented in  
242 brain regions associated with both mentalizing (TPJ and STS) and goal-directed  
243 decision-making (OFC). Critically, the representation in the OFC was predictive of  
244 monetary allocation choices at the individual level. Using a permutation test, we  
245 confirmed that this relationship cannot be accounted for by population-level effects of  
246 warmth and competence, and instead implies that individual differences in the OFC  
247 signals are associated with those in decision-making. This shows that the OFC plays an  
248 important role in driving social decisions based on the perception of others' traits.

249 Evidence that the lateral OFC mediates the effect of trait representations on  
250 social decision-making connects to a large body of evidence in humans and other

251 species that the OFC contributes to goal-directed behavior. Goal-directed behavior is  
252 guided by inferred or imagined outcomes, as opposed to habitual behavior that is  
253 guided by cached values learned through trial and error. Previous studies used  
254 paradigms such as outcome devaluation or preconditioning to demonstrate that the  
255 OFC (in particular the lateral OFC) is necessary for goal-directed behavior in rats<sup>42,43</sup>,  
256 monkeys<sup>44,45</sup>, and humans<sup>46–48</sup>. Furthermore, recent neuroimaging and  
257 electrophysiological studies revealed that the OFC represents latent features of the  
258 environment, such as the hidden state of the current trial in sequential or learning tasks,  
259 that are not directly observable but are critical for outcome prediction<sup>29,30,49–53</sup>. Based on  
260 this evidence, a current influential hypothesis posits that the OFC represents aspects of  
261 the environment that are not fully observable but critical (or at least beneficial) for  
262 inference on future outcomes, and thereby guides flexible, goal-directed decision-  
263 making<sup>31–35</sup>.

264 Our findings, that the lateral OFC represents the perceived traits of others, and  
265 that this representation is predictive of individual choices regarding these others, are  
266 consistent with the hypothesized function of the OFC. First, recipients' traits are not  
267 directly observable and instead inferred from information about their group membership.  
268 Second, decisions in the current paradigm are guided by inferences about how  
269 subjectively rewarding it would be to allocate money between the self and the recipient,  
270 as opposed to trial-and-error learning. Third, and most important, perceived traits affect  
271 inference-based evaluation of allocation outcomes, as demonstrated by the participants'  
272 revealed preference in the current study as well as our previous studies with

273 independent samples<sup>8</sup>. Taken together, this points to the possibility that the lateral OFC  
274 represent the recipient's traits in the current experimental paradigm because they are  
275 critical variables for inference-based evaluation of resource allocations; it is likely that  
276 the OFC does not represent others' traits in decision contexts that rely on other  
277 variables.

278 Other studies have also shown that the OFC is involved in incorporating  
279 perceptions of others' traits into social decisions in a goal-directed manner. For  
280 instance, racial features of faces are represented in the OFC when participants chose  
281 whether to befriend them (goal-directed decision-making) but not when they judged  
282 whether they looked athletic (not goal-directed decision-making)<sup>54</sup>, and patients with  
283 lateral OFC damage are able to judge competence of faces but fail to incorporate it into  
284 voting decisions<sup>55</sup>. These findings, along with various social deficits exhibited by  
285 patients with OFC damage<sup>35</sup>, show that the role of OFC in inference-based, goal-  
286 directed decision-making extends to the social domain. Indeed, inference-based  
287 outcome evaluation is critical for a wide range of social decisions, since the social world  
288 is characterized by a high degree of uncertainty with complex latent structures (e.g.,  
289 who are friends and who are foes) and countless unobservable variables (e.g., beliefs  
290 and preferences of individuals)<sup>56,57</sup>.

291 We also found neural representations of recipients' traits in several regions  
292 outside the OFC. Among them, the right TPJ and the left STS are prominent areas in  
293 the mentalizing network, which is consistently activated when people infer others' traits,  
294 including based on their group membership (i.e., stereotyping)<sup>21-25</sup>. Our results extend



295 these previous findings by showing that multi-voxel response patterns in the TPJ and  
296 STS contain multi-dimensional information about the perceived traits of others.  
297 Interestingly, the STS (particularly its ventral bank, where we found trait  
298 representations) is anatomically connected to the lateral OFC in monkeys<sup>58</sup>, raising the  
299 possibility that the goal-directed representations in the OFC rely on inputs from the  
300 mentalizing network. In addition, the regions where we found trait representations  
301 outside the mentalizing network are also anatomically connected to the lateral OFC in  
302 monkeys<sup>58–60</sup>, and many of these regions are also functionally coupled with the lateral  
303 OFC in resting-state and task-based fMRI in humans<sup>61,62</sup>. Taken together, these  
304 findings suggest that the use of stereotypes in social decision-making relies on  
305 interaction between two key systems: one anchored on the mentalizing network, which  
306 is responsible for inferences about others' traits, and the other primarily centered on the  
307 OFC, which incorporates the inferred traits into outcome inferences and evaluation in a  
308 context-dependent, goal-directed manner. This account is further supported by our  
309 finding that signals in the OFC, but not in other regions, are correlated with individual  
310 choices, which suggests that the OFC contributes to subsequent decision-making  
311 processes<sup>63</sup>.

312 Our findings open up a number of exciting questions for future research. First,  
313 future studies are needed to better understand the circuit-level mechanisms through  
314 which multi-dimensional representations in the OFC drive subsequent decision-making  
315 processes. For example, it is possible that the context-specific effects of social  
316 perception on behavior (warmth affects advantageous inequity aversion, while

317 competence affects disadvantageous inequity aversion) could be mediated by flexible  
318 readout of the OFC signals by downstream regions<sup>64</sup>. Second, it remains an open  
319 question how trait representations in the mentalizing network and the OFC are  
320 constructed from semantic knowledge about social groups, possibly represented in the  
321 anterior temporal lobe<sup>65–67</sup>. Third, while we did not find evidence of trait representations  
322 in the hippocampus, a previous study reported that self-other relationships are  
323 represented in the hippocampus in a two-dimensional ego-centric space<sup>68</sup>. This raises  
324 the intriguing possibility that the OFC and hippocampus play complementary roles in  
325 social decision-making by representing the social world in different frames of  
326 reference<sup>31,32,69–71</sup>. Finally, our findings have the potential to inform future inquiry into  
327 the neuroscience of discrimination, for example by quantifying relationships between  
328 societal treatment of social groups and representations of their traits in the OFC<sup>9,72,73</sup>,  
329 as well as into disorders of social function, for example by separating social deficits  
330 arising from an atypical neural representation of others' traits from those arising from an  
331 atypical integration of trait representations into value-based decision-making<sup>74</sup>.

332 Future research could also elucidate why trait representation was not observed in  
333 the MPFC in this context, at least at a standard statistical threshold for whole-brain  
334 analysis. Although the MPFC is also generally recruited during stereotyping<sup>22–25</sup> and  
335 mentalizing<sup>15–19,75,76</sup>, it is possible that the MPFC contributes to stereotyping in a way  
336 that does not involve trait representations in a two-dimensional warmth-competence  
337 space<sup>28,71,77,78</sup>; that its contributions might be more specialized for inferences about  
338 individuals based on richer, more individuating information<sup>79–82</sup>; or that its involvement

339 depends on the degree to which mentalizing is explicitly called for. For example,  
340 previous studies reported that the MPFC is more activated when participants receive  
341 explicit instructions to mentalize<sup>83</sup>, whereas the TPJ is consistently activated even when  
342 no explicit instructions or incentives for mentalizing are provided<sup>75,84,85</sup>. These  
343 possibilities further highlight the potential importance of goals and incentives in  
344 understanding the neural basis of social decision-making.

345 More broadly, while the current study focused on stereotypes, this is not the only  
346 route to trait inference. For instance, people often assume that others tend to hold  
347 attitudes or beliefs like their own (social projection), particularly when making inferences  
348 about individuals that are perceived to be similar to themselves<sup>4,18,81,82,86</sup>. Furthermore,  
349 for individuals with whom people interact extensively, trait information can be  
350 accumulated across learning from experience<sup>65,87,88</sup>. It remains an open question how  
351 trait information acquired through these different routes impacts social decisions at the  
352 cognitive and neural levels. For its part, the current study establishes how stereotypes  
353 drive social decisions via goal-directed representations in the OFC, forming the basis for  
354 a more comprehensive understanding of the neural mechanisms through which different  
355 types of social inferences affect social decisions across different contexts.

## 356 **Materials and Methods**

357

358 All procedures were approved by the Institutional Review Boards at the University of  
359 California, Berkeley, and Virginia Tech.

360

361 **Participants** 43 healthy people provided informed consent in accordance with the  
362 Declaration of Helsinki and participated in the experiment. Data from 1 participant were  
363 removed for image artifacts and data from an additional 10 participants were removed  
364 for excessive motion (showing frame-wise or cumulative displacement of >2mm in  
365 translation or >2.5 degrees in rotation), leaving data from 32 participants for analysis (22  
366 female, 10 male, age: 18-64, mean = 27.5, standard deviation = 11.4).

367

368 **Task overview** Participants chose how to allocate monetary resources between  
369 themselves and a series of recipients in a modified dictator game. On each trial, the  
370 participant viewed one piece of social group information about the recipient for that trial  
371 (e.g., nurse, Japanese), along with two allocation options. In a majority of trials, one of  
372 the options provided an equal division of resources between the participant and the  
373 recipient, while the other option provided an unequal division of resources favoring  
374 either the participant (advantageous inequity) or the recipient (disadvantageous  
375 inequity). In the remaining trials, both options provided equal divisions in different  
376 amounts; these trials were only included to encourage the participant to pay attention to  
377 both sets of payoffs and were not included in the primary analyses in this paper (see  
378 Fig. S2c, d for behavioral data in these trials). In all cases, the participant decided  
379 unilaterally which option to choose, while the recipient had no ability to affect the  
380 outcome.

381

382 **Recipient identities** The recipient was described by one of 20 social group  
383 memberships, which were originally developed in our previous study<sup>8</sup> to span a wide  
384 range of trait perceptions along the core dimensions of warmth and competence. The  
385 group membership was described by one of the following attributes: occupation  
386 (accountant, surgeon, lawyer, nurse, stay-at-home parent, Olympic athlete, farmer),  
387 nationality (Japanese, Irish, British, Spanish, Greek), ethnicity (Jewish, Arab), medical  
388 history (mental disability), age demographic (elderly), psychiatric history (drug  
389 addiction), housing status (homeless), financial status (welfare recipient), and legal  
390 status (prison inmate). The group membership was presented along with the attribute,  
391 e.g., "Occupation: Nurse" or "Nationality: Japanese".

392

393 In all behavioral and fMRI analyses, we used ratings of these recipients' warmth and  
394 competence collected from an independent sample in an online experiment ( $n = 252$ ,  
395 Study 1b in our previous study<sup>8</sup>). To confirm that this independently measured social  
396 perception was shared by participants in the current fMRI experiment, we also asked  
397 these participants to rate recipients' warmth and competence after the scan. We  
398 confirmed that the average ratings obtained in the current study were highly correlated

399 with the independent ratings, demonstrating the robustness of our social perception  
400 measures (Fig. S1).

401  
402 **Monetary allocation options** While the equal allocation option provided the same  
403 amount to the participant and the recipient (\$10) across all trials, payoffs in the unequal  
404 allocation option were varied across trials. The payoff structure ([own payoff, the  
405 recipient's payoff]) was either [\$20, \$5], [\$15, \$9], or [\$14, \$6] in advantageous inequity  
406 trials, and either [\$5, \$20], [\$9, \$15], or [\$6, \$14] in disadvantageous inequity trials.  
407 Therefore, in the advantageous inequity trials, the participant can maximize their own  
408 payoff by choosing the unequal allocation and maximize the recipient's payoff by  
409 choosing the equal allocation. Conversely, in the disadvantageous inequity trials, they  
410 can maximize their own payoff by choosing the equal allocation and maximize the  
411 recipient's payoff by choosing the unequal allocation.

412  
413 **Procedure** Participants completed the task inside the MRI scanner and indicated their  
414 choices using a button box. The task was programmed in python using the Pygame  
415 package. Prior to scanning, participants were instructed that, although the monetary  
416 allocations in this task were hypothetical, they should indicate as honestly as possible  
417 which choice they would prefer if it were to affect the actual payoffs of themselves and  
418 the recipient. Throughout scanning, each of 8 payoff structures was presented once for  
419 each of the 20 recipients; in total,  $8 \times 20 = 160$  trials were presented in a randomized  
420 order for each participant. The scanning consisted of two runs (80 trials each), with  
421 each recipient appearing four times per run.

422  
423 In each trial, the participant was first presented with the recipient information (duration  
424 between 2.5 sec to 5.5 sec: varied across scanning runs and participants), and then  
425 with two allocation options, presented side by side. To mitigate cognitive load, the  
426 constant equal allocation [\$10, \$10] was always presented to the left, while the right  
427 option was varied across trials. After a delay (jittered between 3 sec and 6 sec), both  
428 options were outlined by blue boxes, which prompted the participant to indicate a choice  
429 by pressing one of two buttons. Participants were asked to press a button within 5  
430 seconds; the trial was automatically terminated (and not repeated) when they did not  
431 press a button within that window.

432  
433 **Behavioral data analysis** Economic theories of distributional preference posit that  
434 decision-making in the Dictator game is driven primarily by two factors: maximization of  
435 one's own payoff and concern for the inequity between one's own payoff and the  
436 recipient's payoff<sup>11,12</sup>. They further posit that preferences regarding advantageous  
437 inequity are distinct from preferences regarding disadvantageous inequity<sup>89,90</sup>. In recent  
438 work, we found that aversion to advantageous inequity increases with the recipient's  
439 perceived warmth (but does not depend on their perceived competence) and aversion  
440 to disadvantageous inequity increases with the recipient's perceived competence (but  
441 does not depend on their perceived warmth)<sup>8</sup>. In that study, the participant decided how  
442 many tokens to share with the recipient in a continuous manner, and thus it was up to

443 them whether and how often they created advantageous or disadvantageous inequity.  
444 We adopted a different task design in the current study, which used two-alternative  
445 forced choices regarding advantageous and disadvantageous inequity in separate trials,  
446 which allowed us to test the dissociable effects of perceived warmth and competence  
447 on inequity preference even more directly.

448  
449 We counted how often the participants chose the unequal allocation over the equal  
450 allocation against each recipient in advantageous and disadvantageous inequity trials  
451 and tested their correlation with the perceived warmth and competence of the recipients  
452 for those choices (Fig. 1c). The statistical significance of the correlation was assessed  
453 via permutation (9,999 iterations). The same permutation test was also used to assess  
454 whether the effects of warmth and competence on choice frequencies were different  
455 from each other (i.e., statistical significance on the difference in correlations). While Fig.  
456 1c shows choice frequencies marginalized over payoff structures in each trial type, the  
457 relationship with trait perceptions was robustly observed even when measured for each  
458 payoff structure separately (Fig. S2a, b).

459  
460 **MRI data acquisition** MR images were acquired by a 3T Siemens Magnetom Trio  
461 scanner and a 12-channel head coil. A 3D high-resolution structural image was  
462 acquired using a T1-weighted magnetization-prepared rapid-acquisition gradient-echo  
463 (MPRAGE) pulse sequence (voxel size = 1 × 1 × 1 mm, matrix size = 190 × 239, 200  
464 axial slices, TR = 2300 msec, TE = 2.98 msec). While participants completed the task,  
465 functional images were acquired using a T2\*-weighted gradient echo-planar imaging  
466 (EPI) pulse sequence (voxel size = 3 × 3 × 3 mm, interslice gap = 0.15 mm, matrix size  
467 = 64 × 64, 32 oblique axial slices, TR = 2000 msec, TE = 30 msec). Slices were angled  
468 +30 degrees with respect to the anterior commissure-posterior commissure line to  
469 reduce signal dropout in the orbitofrontal cortex<sup>91</sup>.

470  
471 **MRI data analysis: trait perception.** We conducted a whole-brain searchlight  
472 Representational Similarity Analysis (RSA) to look for neural representations of the  
473 recipient's perceived traits<sup>40</sup>. More specifically, we looked for brain regions in which  
474 voxel-wise local response patterns evoked by two recipients are similar (dissimilar)  
475 when their perceived traits are also similar (dissimilar) to each other. Our RSA  
476 formulated this relationship as the correlation between two representational dissimilarity  
477 matrices (RDMs), one that captures dissimilarity in trait perception (trait RDM) and one  
478 that captures dissimilarity in response patterns (neural RDM), in all possible pairs of  
479 recipients (20 recipients, 190 pairwise similarity measures).

480  
481 For the trait RDM, pairwise dissimilarity in perceived traits was quantified as Euclidean  
482 distance in a two-dimensional space of perceived warmth and competence (Fig. 1a).  
483 Empirical measures of warmth and competence perceptions were originally obtained as  
484 numeric scores between 0 and 100<sup>8</sup>. We z-scored each dimension across the 20  
485 recipients to construct the Euclidean space.

486

487 The neural RDM was computed at every voxel within grey matter in native space.  
488 Pairwise dissimilarity in voxel-wise response patterns was quantified as the cross-  
489 validated Mahalanobis (Crossnobis) distance in a gray-matter spherical searchlight  
490 (10mm radius). Crossnobis distance is an unbiased measure of the extent to which  
491 response patterns evoked by two recipients are *consistently distinguishable across*  
492 *scanning runs*<sup>41</sup>. We chose this distance measure over alternative measures because  
493 we were primarily interested in how recipients are *distinguished* in their neural  
494 representation, rather than how they are *similarly represented*. In our experiment, since  
495 each recipient was presented four times in each of the two scanning runs, we were able  
496 to cross-validate distance estimates across runs to mitigate spurious distance caused  
497 by noise (overfitting).

498  
499 The pairwise Crossnobis distance was estimated following the formulae provided  
500 previously<sup>41</sup>. We first estimated voxel-wise response patterns evoked by each recipient  
501 in each scanning run using a GLM implemented in SPM12. To retain fine-grained  
502 signals as much as possible, minimal preprocessing (only motion correction) was  
503 applied to EPIs prior to the GLM. The GLM included the regressors of interest, modeling  
504 the presentation of each recipient using a box-car function that starts with the onset of  
505 the recipient presentation and ends with the onset of payoffs presentation, along with  
506 nuisance regressors modeling button presses. These regressors were convolved with  
507 the canonical double-gamma hemodynamic response function (HRF) and its temporal  
508 derivative. The GLM also included confound regressors for head motion (3 translations  
509 and 3 rotations, estimated in the motion correction procedure), 128-sec high-pass  
510 filtering, and AR(1) model of serial autocorrelation. The GLM coefficients of each  
511 recipient within the searchlight were then cross-validated across the two runs to obtain  
512 the Crossnobis distance. For Mahalanobis whitening, we estimated the covariance  
513 matrix in the searchlight using the GLM residuals and shrank it for invertibility<sup>92</sup>.

514  
515 We computed Fisher-transformed Spearman correlation between the trait and neural  
516 RDMs at each gray-matter voxel. We discovered that the trait RDM inadvertently  
517 contained information about visual features of the recipient presentation on the screen,  
518 and specifically its character count. This visual confound was controlled by partialling  
519 out another RDM that captured the character count. The resultant correlation map was  
520 normalized to the standard MNI space based on the MPRAGE structural image of each  
521 participant and spatially smoothed (Gaussian kernel FWHM = 8 mm) using SPM12. For  
522 the population-level analysis, a cluster-level permutation test was conducted using FSL  
523 randomise (threshold-free cluster enhancement [TFCE], whole-brain FWE corrected  $p$   
524  $< .05$ , 4,999 iterations).

525  
526 **MRI data analysis: correlation with individual choices.** To look for evidence that any  
527 of the regions that represented the perceived traits (Fig. 2b) contributed to the  
528 subsequent monetary allocation decisions, we ran another RSA which tested the  
529 correlation between neural RDMs and choice RDMs. We predicted that, if a region  
530 contributed to the decisions, local response patterns evoked by two recipients in one

531 participant's brain would be similar (dissimilar) to each other when the participant  
532 treated them in a similar (dissimilar) manner in their allocation choices.

533

534 The individual choice RDM was built on the frequency at which each participant chose  
535 the advantageous or disadvantageous unequal allocation for each recipient. Pairwise  
536 Euclidean distance was measured in the two-dimensional space of the observed choice  
537 frequencies, one dimension for advantageous inequity trials and the other dimension for  
538 disadvantageous inequity trials. Since each recipient was presented in three  
539 advantageous inequity trials and three disadvantageous inequity trials, the choice  
540 frequency on each dimension was either 0, 1/3, 2/3, or 1.

541

542 These individual-level choice RDM were then correlated with neural RDMs in the  
543 regions identified by our first RSA as containing representations of others' traits. Binary  
544 masks were functionally defined in standard MNI space based on the aforementioned  
545 population-level statistics (TFCE, whole-brain FWE corrected  $p < .05$ ) and converted to  
546 the native space of each participant's brain using SPM12. The z-transformed Spearman  
547 correlation between the choice and neural RDMs was averaged across all voxels in the  
548 native-space masks.

549

550 In order to test whether neural response patterns predicted individual choice patterns  
551 *above and beyond* the population-level effects of warmth and competence, we  
552 conducted a permutation test, randomly pairing choice and neural RDMs from different  
553 participants (4,999 iterations). To control for multiple comparisons across ROIs, the null-  
554 hypothesis distribution was constructed by taking the highest population average of  
555 correlation scores across the ROIs in each permutation iteration.



## 556 **References**

557

558 1. Greenwald, A. G. & Banaji, M. R. Implicit social cognition: Attitudes, self-esteem, and  
559 stereotypes. *Psychol Rev* **102**, 4–27 (1995).

560 2. Asch, S. E. Forming impressions of personality. *J Abnorm Soc Psychology* **41**, 258–  
561 290 (1946).

562 3. Greenwald, A. G. & Lai, C. K. Implicit Social Cognition. *Annu Rev Psychol* **71**, 1–27  
563 (2019).

564 4. Ames, D. R. Inside the Mind Reader’s Tool Kit: Projection and Stereotyping in Mental  
565 State Inference. *J Pers Soc Psychol* **87**, 340–353 (2004).

566 5. Abele, A. E., Ellemers, N., Fiske, S. T., Koch, A. & Yzerbyt, V. Navigating the social  
567 world: Toward an integrated framework for evaluating self, individuals, and groups.  
568 *Psychol Rev* **128**, 290–314 (2021).

569 6. Fiske, S. T., Cuddy, A. J. C. & Glick, P. Universal dimensions of social cognition:  
570 warmth and competence. *Trends Cogn Sci* **11**, 77–83 (2007).

571 7. Bertrand, M. & Duflo, E. Field Experiments on Discrimination. in *Handbook of Field*  
572 *Experiments* (eds. Banerjee, A. & Duflo, E.) (2017).

573 8. Jenkins, A. C., Karashchuk, P., Zhu, L. & Hsu, M. Predicting human behavior toward  
574 members of different social groups. *P Natl Acad Sci Usa* **115**, 9696–9701 (2018).

575 9. Amodio, D. M. The neuroscience of prejudice and stereotyping. *Nat Rev Neurosci* **15**,  
576 670–682 (2014).

577 10. Andreoni, J. & Miller, J. Giving According to GARP: An Experimental Test of the  
578 Consistency of Preferences for Altruism. *Econometrica* **70**, 737–753 (2002).

579 11. Charness, G. & Rabin, M. Understanding Social Preferences with Simple Tests. *Q J*  
580 *Econ* **117**, 817–869 (2002).

581 12. Fehr, E. & Schmidt, K. M. A Theory of Fairness, Competition, and Cooperation. *Q J*  
582 *Econ* **114**, 817–868 (1999).

583 13. Schurz, M., Radua, J., Aichhorn, M., Richlan, F. & Perner, J. Fractionating theory of  
584 mind: A meta-analysis of functional brain imaging studies. *Neurosci Biobehav Rev* **42**,  
585 9–34 (2014).

586 14. Saxe, R. & Kanwisher, N. People thinking about thinking people: The role of the  
587 temporo-parietal junction in “theory of mind.” *Neuroimage* **19**, 1835–1842 (2003).

- 588 15. Amodio, D. M. & Frith, C. D. Meeting of minds: the medial frontal cortex and social  
589 cognition. *Nat Rev Neurosci* **7**, 268–277 (2006).
- 590 16. Spreng, R. N., Mar, R. A. & Kim, A. S. N. The Common Neural Basis of  
591 Autobiographical Memory, Propection, Navigation, Theory of Mind, and the Default  
592 Mode: A Quantitative Meta-analysis. *J Cognitive Neurosci* **21**, 489–510 (2009).
- 593 17. Frith, C. D. & Frith, U. Interacting Minds--A Biological Basis. *Science* **286**, 1692–  
594 1695 (1999).
- 595 18. Jenkins, A. C. & Mitchell, J. P. How Has Cognitive Neuroscience Contributed to  
596 Social Psychological Theory? in *Social Neuroscience: Towards Understanding the*  
597 *Underpinnings of the Social Mind* (eds. Todorov, A., Fiske, S. & Prentice, D.) (Oxford  
598 University Press, 2011).
- 599 19. Molenberghs, P., Johnson, H., Henry, J. D. & Mattingley, J. B. Understanding the  
600 minds of others: A neuroimaging meta-analysis. *Neurosci Biobehav Rev* **65**, 276–291  
601 (2016).
- 602 20. Mars, R. B. *et al.* On the relationship between the “default mode network” and the  
603 “social brain.” *Front Hum Neurosci* **6**, 189 (2012).
- 604 21. Contreras, J. M., Banaji, M. R. & Mitchell, J. P. Dissociable neural correlates of  
605 stereotypes and other forms of semantic knowledge. *Soc Cogn Affect Neur* **7**, 764–770  
606 (2012).
- 607 22. Van der Cruyssen, L., Heleven, E., Ma, N., Vandekerckhove, M. & Van Overwalle,  
608 F. Distinct neural correlates of social categories and personality traits. *Neuroimage* **104**,  
609 336–346 (2015).
- 610 23. Contreras, J. M., Schirmer, J., Banaji, M. R. & Mitchell, J. P. Common Brain  
611 Regions with Distinct Patterns of Neural Responses during Mentalizing about Groups  
612 and Individuals. *J Cognitive Neurosci* **25**, 1406–1417 (2013).
- 613 24. Quadflieg, S. *et al.* Exploring the Neural Correlates of Social Stereotyping. *J*  
614 *Cognitive Neurosci* **21**, 1560–1570 (2009).
- 615 25. Delplanque, J., Heleven, E. & Van Overwalle, F. Neural representations of Groups  
616 and Stereotypes using fMRI repetition suppression. *Sci Rep* **9**, 3190 (2019).
- 617 26. Tamir, D. I., Thornton, M. A., Contreras, J. M. & Mitchell, J. P. Neural evidence that  
618 three dimensions organize mental state representation: Rationality, social impact, and  
619 valence. *Proc Natl Acad Sci USA* **113**, 194–199 (2016).

- 620 27. Mitchell, J. P., Ames, D. L., Jenkins, A. C. & Banaji, M. R. Neural correlates of  
621 stereotype application. *J Cognitive Neurosci* **21**, 594–604 (2009).
- 622 28. Harris, L. T. & Fiske, S. T. Dehumanizing the Lowest of the Low: Neuroimaging  
623 Responses to Extreme Out-Groups. *Psychol Sci* **17**, 847–853 (2006).
- 624 29. Schuck, N. W., Cai, M. B., Wilson, R. C. & Niv, Y. Human Orbitofrontal Cortex  
625 Represents a Cognitive Map of State Space. *Neuron* **91**, 1402–1412 (2016).
- 626 30. Wilson, R. C., Takahashi, Y. K., Schoenbaum, G. & Niv, Y. Orbitofrontal cortex as a  
627 cognitive map of task space. *Neuron* **81**, 267–279 (2014).
- 628 31. Padoa-Schioppa, C. & Conen, K. E. Orbitofrontal Cortex: A Neural Circuit for  
629 Economic Decisions. *Neuron* **96**, 736–754 (2017).
- 630 32. Wikenheiser, A. M. & Schoenbaum, G. Over the river, through the woods: cognitive  
631 maps in the hippocampus and orbitofrontal cortex. *Nat Rev Neurosci* **17**, 513–523  
632 (2016).
- 633 33. Stalnaker, T. A., Cooch, N. K. & Schoenbaum, G. What the orbitofrontal cortex does  
634 not do. *Nat Neurosci* **18**, 620–627 (2015).
- 635 34. Niv, Y. Learning task-state representations. *Nat Neurosci* **22**, 1544–1553 (2019).
- 636 35. Yu, L. Q., Kan, I. P. & Kable, J. W. Beyond a rod through the skull: A systematic  
637 review of lesion studies of the human ventromedial frontal lobe. *Cognitive Neuropsych*  
638 **37**, 1–45 (2019).
- 639 36. Dovidio, J. F., Kawakami, K., Johnson, C., Johnson, B. & Howard, A. On the Nature  
640 of Prejudice: Automatic and Controlled Processes. *J Exp Soc Psychol* **33**, 510–540  
641 (1997).
- 642 37. Ben-Ner, A., McCall, B. P., Stephane, M. & Wang, H. Identity and in-group/out-  
643 group differentiation in work and giving behaviors: Experimental evidence. *J Econ*  
644 *Behav Organ* **72**, 153–170 (2009).
- 645 38. Hamermesh, D. S. & Biddle, J. E. Beauty and the Labor Market. *Am Econ Rev* **84**,  
646 1174–1194 (1994).
- 647 39. Mobius, M. M. & Rosenblat, T. S. Why Beauty Matters. *Am Econ Rev* **96**, 222–235  
648 (2006).
- 649 40. Kriegeskorte, N., Mur, M. & Bandettini, P. Representational similarity analysis–  
650 connecting the branches of systems neuroscience. *Frontiers Syst Neurosci* **2**, 4 (2008).

- 651 41. Walther, A. *et al.* Reliability of dissimilarity measures for multi-voxel pattern analysis.  
652 *Neuroimage* **137**, 188–200 (2016).
- 653 42. Gallagher, M., McMahan, R. W. & Schoenbaum, G. Orbitofrontal Cortex and  
654 Representation of Incentive Value in Associative Learning. *J Neurosci* **19**, 6610–6614  
655 (1999).
- 656 43. Jones, J. L. *et al.* Orbitofrontal Cortex Supports Behavior and Learning Using  
657 Inferred But Not Cached Values. *Science* **338**, 953–956 (2012).
- 658 44. Izquierdo, A., Suda, R. K. & Murray, E. A. Bilateral Orbital Prefrontal Cortex Lesions  
659 in Rhesus Monkeys Disrupt Choices Guided by Both Reward Value and Reward  
660 Contingency. *J Neurosci* **24**, 7540–7548 (2004).
- 661 45. West, E. A., DesJardin, J. T., Gale, K. & Malkova, L. Transient Inactivation of  
662 Orbitofrontal Cortex Blocks Reinforcer Devaluation in Macaques. *J Neurosci* **31**, 15128–  
663 15135 (2011).
- 664 46. Reber, J. *et al.* Selective impairment of goal-directed decision-making following  
665 lesions to the human ventromedial prefrontal cortex. *Brain* **140**, 1743–1756 (2017).
- 666 47. Wang, F., Howard, J. D., Voss, J. L., Schoenbaum, G. & Kahnt, T. Targeted  
667 Stimulation of an Orbitofrontal Network Disrupts Decisions Based on Inferred, Not  
668 Experienced Outcomes. *J Neurosci* **40**, 8726–8733 (2020).
- 669 48. Howard, J. D. *et al.* Targeted Stimulation of Human Orbitofrontal Networks Disrupts  
670 Outcome-Guided Behavior. *Curr Biol* **30**, 490-498.e4 (2020).
- 671 49. Chan, S. C. Y., Niv, Y. & Norman, K. A. A Probability Distribution over Latent  
672 Causes, in the Orbitofrontal Cortex. *J Neurosci* **36**, 7817–7828 (2016).
- 673 50. Zhou, J. *et al.* Evolving schema representations in orbitofrontal ensembles during  
674 learning. *Nature* **590**, 606–611 (2021).
- 675 51. Stalnaker, T. A., Raheja, N. & Schoenbaum, G. Orbitofrontal State Representations  
676 Are Related to Choice Adaptations and Reward Predictions. *J Neurosci* **41**, 1941–1951  
677 (2021).
- 678 52. Nassar, M. R., McGuire, J. T., Ritz, H. & Kable, J. W. Dissociable Forms of  
679 Uncertainty-Driven Representational Change Across the Human Brain. *J Neurosci* **39**,  
680 1688–1698 (2019).
- 681 53. Saez, I. *et al.* Encoding of Multiple Reward-Related Computations in Transient and  
682 Sustained High-Frequency Activity in Human OFC. *Curr Biol* **28**, 2889-2899.e3 (2018).

- 683 54. Gilbert, S. J., Swencionis, J. K. & Amodio, D. M. Evaluative vs. trait representation  
684 in intergroup social judgments: Distinct roles of anterior temporal lobe and prefrontal  
685 cortex. *Neuropsychologia* **50**, 3600–3611 (2012).
- 686 55. Xia, C., Stolle, D., Gidengil, E. & Fellows, L. K. Lateral Orbitofrontal Cortex Links  
687 Social Impressions to Political Choices. *J Neurosci* **35**, 8507–8514 (2015).
- 688 56. Jenkins, A. C. & Mitchell, J. P. Mentalizing under uncertainty: dissociated neural  
689 responses to ambiguous and unambiguous mental state inferences. *Cereb Cortex* **20**,  
690 404–10 (2010).
- 691 57. Karmarkar, U. R. & Jenkins, A. C. Neural and Behavioral Insights into Online Trust  
692 and Uncertainty. in *Organizational Neuroethics* (eds. Martineau, J. & Racine, E.) 191–  
693 207 (2020).
- 694 58. Carmichael, S. T. & Price, J. L. Sensory and premotor connections of the orbital and  
695 medial prefrontal cortex of macaque monkeys. *J Comp Neurol* **363**, 642–664 (1995).
- 696 59. Saleem, K. S., Kondo, H. & Price, J. L. Complementary circuits connecting the  
697 orbital and medial prefrontal networks with the temporal, insular, and opercular cortex in  
698 the macaque monkey. *J Comp Neurol* **506**, 659–693 (2008).
- 699 60. Carmichael, S. T. & Price, J. L. Connectional networks within the orbital and medial  
700 prefrontal cortex of macaque monkeys. *J Comp Neurol* **371**, 179–207 (1996).
- 701 61. Zald, D. H. *et al.* Meta-Analytic Connectivity Modeling Reveals Differential  
702 Functional Connectivity of the Medial and Lateral Orbitofrontal Cortex. *Cereb Cortex* **24**,  
703 232–248 (2014).
- 704 62. Kahnt, T., Chang, L. J., Park, S. Q., Heinzle, J. & Haynes, J.-D. Connectivity-based  
705 parcellation of the human orbitofrontal cortex. *J Neurosci* **32**, 6240–6250 (2012).
- 706 63. Ballesta, S., Shi, W., Conen, K. E. & Padoa-Schioppa, C. Values encoded in  
707 orbitofrontal cortex are causally related to economic choices. *Nature* **588**, 450–453  
708 (2020).
- 709 64. Birman, D. & Gardner, J. L. A flexible readout mechanism of human sensory  
710 representations. *Nat Commun* **10**, 3500 (2019).
- 711 65. Amodio, D. M. Social Cognition 2.0: An Interactive Memory Systems Account.  
712 *Trends Cogn Sci* **23**, 21–33 (2019).
- 713 66. Amodio, D. M. & Cikara, M. The Social Neuroscience of Prejudice. *Annu Rev*  
714 *Psychol* **72**, 1–31 (2020).

- 715 67. Olson, I. R., McCoy, D., Klobusicky, E. & Ross, L. A. Social cognition and the  
716 anterior temporal lobes: a review and theoretical framework. *Soc Cogn Affect Neur* **8**,  
717 123–133 (2013).
- 718 68. Tavares, R. M. *et al.* A Map for Social Navigation in the Human Brain. *Neuron* **87**,  
719 231–243 (2015).
- 720 69. Behrens, T. E. J. *et al.* What Is a Cognitive Map? Organizing Knowledge for Flexible  
721 Behavior. *Neuron* **100**, 490–509 (2018).
- 722 70. Park, S. A., Miller, D. S., Nili, H., Ranganath, C. & Boorman, E. D. Map Making:  
723 Constructing, Combining, and Inferring on Abstract Cognitive Maps. *Neuron* **107**, 1226-  
724 1238.e8 (2020).
- 725 71. Park, S. A., Miller, D. S. & Boorman, E. D. Inferences on a multidimensional social  
726 hierarchy use a grid-like code. *Nat Neurosci* **24**, 1292–1301 (2021).
- 727 72. Kubota, J. T., Banaji, M. R. & Phelps, E. A. The neuroscience of race. *Nat Neurosci*  
728 **15**, 940–948 (2012).
- 729 73. Mattan, B. D., Wei, K. Y., Cloutier, J. & Kubota, J. T. The Social Neuroscience of  
730 Race- and Status-Based Prejudice. *Curr Opin Psychology* **24**, 27–34 (2018).
- 731 74. Gray, K., Jenkins, A. C., Heberlein, A. S. & Wegner, D. M. Distortions of mind  
732 perception in psychopathology. *Proc National Acad Sci* **108**, 477–479 (2011).
- 733 75. Van Overwalle, F. & Vandekerckhove, M. Implicit and explicit social mentalizing:  
734 dual processes driven by a shared neural network. *Front Hum Neurosci* **7**, 560 (2013).
- 735 76. Schurz, M. *et al.* Toward a hierarchical model of social cognition: A neuroimaging  
736 meta-analysis and integrative review of empathy and theory of mind. *Psychol Bull* **147**,  
737 293–327 (2021).
- 738 77. Van Overwalle, F., Ma, N. & Baetens, K. Nice or nerdy? The neural representation  
739 of social and competence traits. *Soc Neurosci* **11**, 1–12 (2015).
- 740 78. Li, M. *et al.* Warmth is more influential than competence: an fMRI repetition  
741 suppression study. *Brain Imaging Behav* **15**, 266–275 (2021).
- 742 79. Van Overwalle, F. Social cognition and the brain: A meta-analysis. *Hum Brain Mapp*  
743 **30**, 829–858 (2009).
- 744 80. Heleven, E. & Van Overwalle, F. The person within: memory codes for persons and  
745 traits using fMRI repetition suppression. *Soc Cogn Affect Neur* **11**, 159–171 (2016).

- 746 81. Mitchell, J. P., Macrae, C. N. & Banaji, M. R. Dissociable Medial Prefrontal  
747 Contributions to Judgments of Similar and Dissimilar Others. *Neuron* **50**, 655–663  
748 (2006).
- 749 82. Jenkins, A. C., Macrae, C. N. & Mitchell, J. P. Repetition suppression of  
750 ventromedial prefrontal activity during judgments of self and others. *Proc Natl Acad Sci*  
751 *USA* **105**, 4507–4512 (2008).
- 752 83. Mitchell, J. P., Banaji, M. R. & Macrae, C. N. The Link between Social Cognition and  
753 Self-referential Thought in the Medial Prefrontal Cortex. *J Cognitive Neurosci* **17**, 1306–  
754 1315 (2005).
- 755 84. Boccadoro, S. *et al.* Defining the neural correlates of spontaneous theory of mind  
756 (ToM): An fMRI multi-study investigation. *Neuroimage* **203**, 116193 (2019).
- 757 85. Kestemont, J., Vandekerckhove, M., Ma, N., Hoeck, N. V. & Van Overwalle, F.  
758 Situation and person attributions under spontaneous and intentional instructions: an  
759 fMRI study. *Soc Cogn Affect Neur* **8**, 481–493 (2013).
- 760 86. Tamir, D. I. & Mitchell, J. P. Anchoring and adjustment during social inferences. *J*  
761 *Exp Psychology Gen* **142**, 151–162 (2013).
- 762 87. Hackel, L. M., Doll, B. B. & Amodio, D. M. Instrumental learning of traits versus  
763 rewards: dissociable neural correlates and effects on choice. *Nat Neurosci* **18**, 1233–  
764 1235 (2015).
- 765 88. Mende-Siedlecki, P., Cai, Y. & Todorov, A. The neural dynamics of updating person  
766 impressions. *Soc Cogn Affect Neur* **8**, 623–631 (2013).
- 767 89. Morishima, Y., Schunk, D., Bruhin, A., Ruff, C. C. & Fehr, E. Linking brain structure  
768 and activation in temporoparietal junction to explain the neurobiology of human altruism.  
769 *Neuron* **75**, 73–79 (2012).
- 770 90. Bruhin, A., Fehr, E. & Schunk, D. The many faces of human sociality: Uncovering  
771 the distribution and stability of social preferences. *J Eur Econ Assoc* **72**, 738 (2018).
- 772 91. Weiskopf, N., Hutton, C., Josephs, O. & Deichmann, R. Optimal EPI parameters for  
773 reduction of susceptibility-induced BOLD sensitivity losses: A whole-brain analysis at  
774 3 T and 1.5 T. *Neuroimage* **33**, 493–504 (2006).
- 775 92. Ledoit, O. & Wolf, M. Honey, I Shrunk the Sample Covariance Matrix. *J Portfolio*  
776 *Management* **30**, 110–119 (2004).

777

778 **Acknowledgments**

779

780 The authors thank Nakyung Lee and Pierre Karashchuk for assistance with paradigm  
781 development; Duy Phan, Amanda Savarese, and Cassandra Carrin for assistance with  
782 data collection; and Dilara Berkay for helpful input and assistance with the preparation  
783 of fMRI data for analysis.



784 **Supplementary Figures**

785

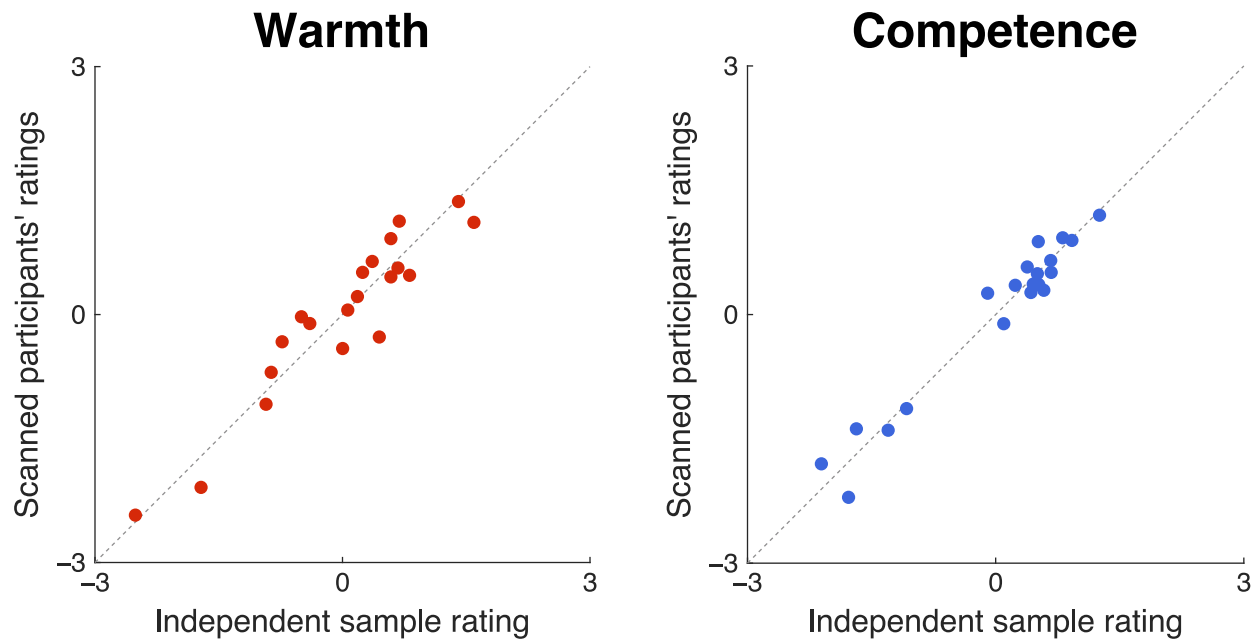

786

787

788 **Fig. S1.** Consistency in trait perception. In all behavioral and fMRI analyses, we used  
789 ratings of warmth and competence from our previous study (Jenkins et al., 2018, Study  
790 1b,  $n = 252$ ; x axis). We also collected ratings from our participants after scanning ( $n =$   
791  $32$ ; y axis). These two sets of ratings are highly correlated (warmth: Pearson's  $r = .943$ ,  
792 competence:  $r = .978$ ), demonstrating the robustness of trait perceptions.

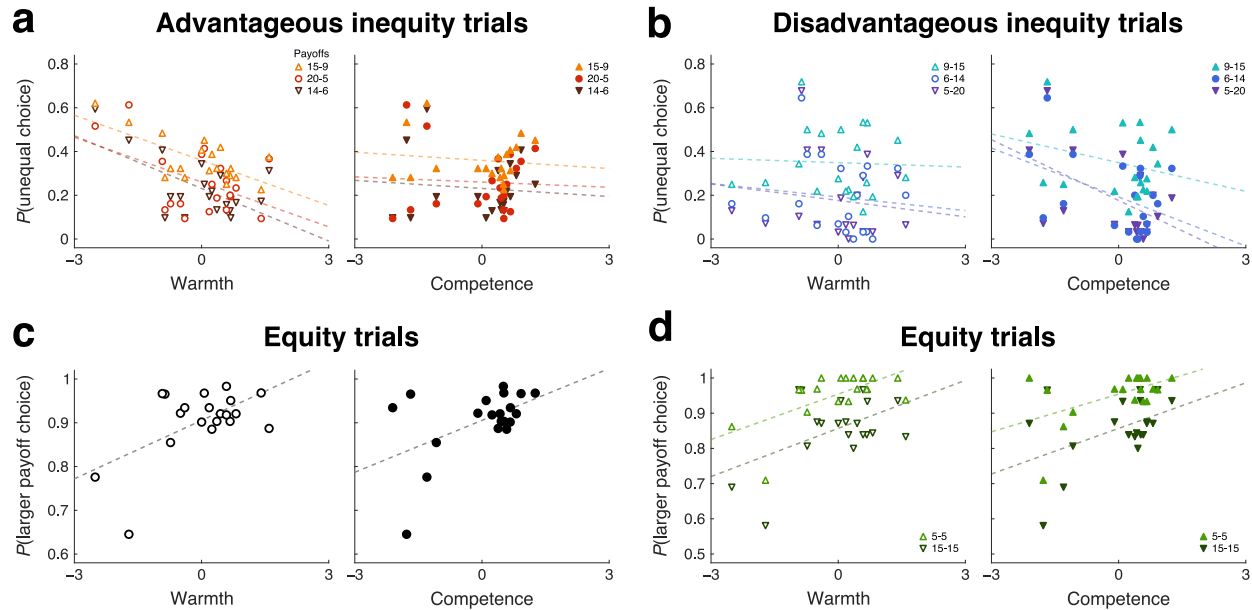

793  
794

795 **Fig. S2.** The effect of perceived traits on monetary allocation choices, separately for  
 796 each payoff structure. **a.** In advantageous inequity trials, the unequal self-recipient  
 797 allocations were either \$15-\$9, \$20-\$6, or \$14-\$6. Consistent patterns were observed  
 798 across these payoff conditions; participants were less likely to choose the unequal  
 799 allocation as the recipient's perceived warmth was higher (*left*, 15-9: Pearson's  $r = -.68$ ,  
 800 permutation  $p = .001$ , 20-5:  $r = -.47$ ,  $p = .021$ , 14-6:  $r = -.60$ ,  $p = .004$ ) irrespective of  
 801 the recipient's perceived competence (*right*, 15-9:  $r = -.12$ ,  $p = .285$ , 20-5:  $r = -.06$ ,  $p =$   
 802  $.386$ , 14-6:  $r = -.09$ ,  $p = .331$ ), and the effect of warmth was stronger than  
 803 competence (15-9:  $p = .001$ , 20-5:  $p = .017$ , 14-6:  $p = .004$ ). **b.** In disadvantageous  
 804 inequity trials, the unequal self-recipient allocations were either \$9-\$15, \$6-\$14, or \$5-  
 805 \$20. Consistent patterns were observed across these payoff conditions, except that the  
 806 competence effect did not reach statistical significance in 9-15; participants were less  
 807 likely to choose the unequal allocation as the recipient's perceived competence was  
 808 higher (*right*, 9-15:  $r = -.28$ ,  $p = .125$ , 6-14:  $r = -.44$ ,  $p = .036$ , 5-20:  $r = -.52$ ,  $p = .018$ )  
 809 irrespective of the recipient's perceived warmth (*left*, 9-15:  $r = -.04$ ,  $p = .417$ , 6-14:  $r =$   
 810  $-.12$ ,  $p = .287$ , 5-20:  $r = -.14$ ,  $p = .265$ ), and the effect of competence was stronger than  
 811 warmth (9-15:  $p = .120$ , 6-14:  $p = .054$ , 5-20:  $p = .024$ ). **c.** In some trials, the participant  
 812 was presented with two equal allocations (one option was \$10-\$10, and the other option  
 813 was either \$5-\$5 or \$15-\$15). These conditions were only included to encourage the  
 814 participant to pay attention to both sets of payoffs and were not discussed in the main  
 815 text. In these trials, participants chose the option with higher payoffs more often when  
 816 the recipient's warmth was higher ( $r = .57$ ,  $p = .009$ ), and also when their competence  
 817 was higher ( $r = .51$ ,  $p = .022$ ). The effects of warmth and competence did not differ  
 818 significantly ( $p = .362$ ). These results demonstrate that participants incorporated the  
 819 recipient's warmth and competence into their choices in a highly context-dependent  
 820 manner. **d.** Consistent behavioral patterns were observed across both payoff conditions  
 821 in the equity trials; the larger payoff frequency increased with warmth (*right*, 5-5:  $r = .63$ ,

822  $p = .006$ , 15-15:  $r = .49$ ,  $p = .022$ ) and competence (*left*, 5-5:  $r = .52$ ,  $p = .020$ , 15-15:  $r$   
823  $= .46$ ,  $p = .033$ ), and their effects were comparable (5-5:  $p = .287$ , 15-15:  $p = .440$ ).
